# Supplementary material for: Highly efficient hydrogen production and selective CO2 reduction by the C3N5 photocatalyst using only visible light
Source: Royal Society of Chemistry journal article supplement (doi:10.1039/d3cp04431a), 2023-11-30
Supplement: d3cp04431a1.pdf [file d3cp04431a1.pdf]

## Supporting Information

### **Highly efficient hydrogen production and selective CO<sub>2</sub> reduction by C<sub>3</sub>N<sub>5</sub> photocatalyst using only visible light**

Kosei Ito and Kei Noda\*

Department of Electronics and Electrical Engineering

Keio University

3-14-1 Hiyoshi, Kohoku-ku, Yokohama, 223-8522 (Japan)

E-mail: [nodakei@elec.keio.ac.jp](mailto:nodakei@elec.keio.ac.jp)

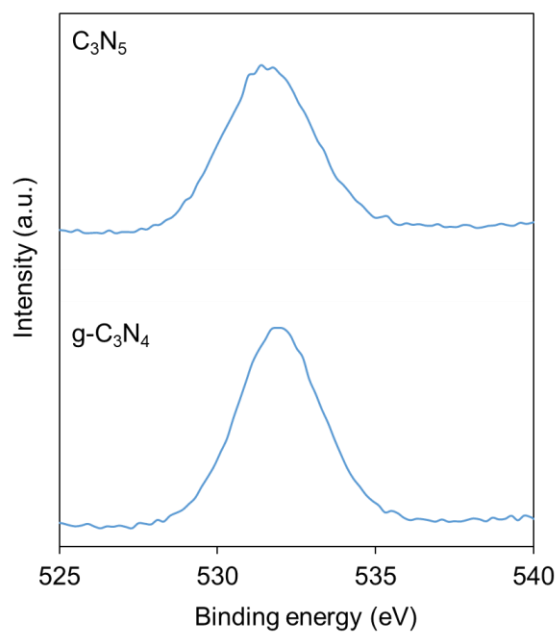

**Fig. S1.** XPS spectra of O1s electrons measured for  $C_3N_5$  and  $g-C_3N_4$ .

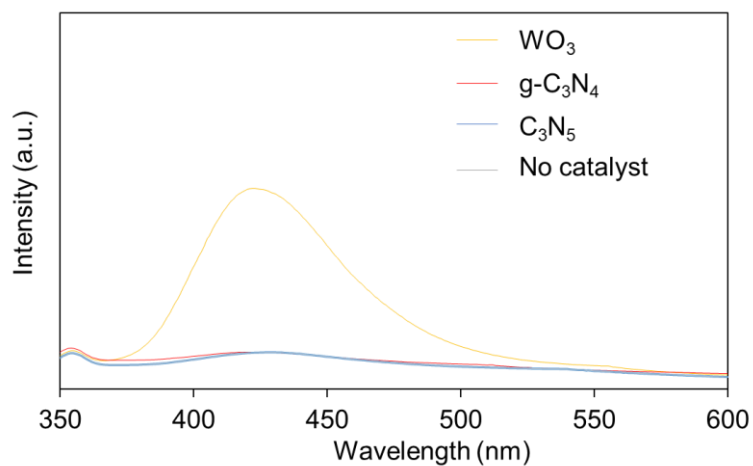

**Fig. S2.** PL spectra of 2-hydroxyterephthalic acid (at 426 nm) measured after VIS irradiation on terephthalic acid (TA) aqueous solutions containing  $C_3N_5$ ,  $g-C_3N_4$ , no catalyst, and  $WO_3$  as a reference material (purchased from Kojundo Chemical Laboratory), respectively. Here, TA was employed as a trapping reagent of hydroxyl radicals.

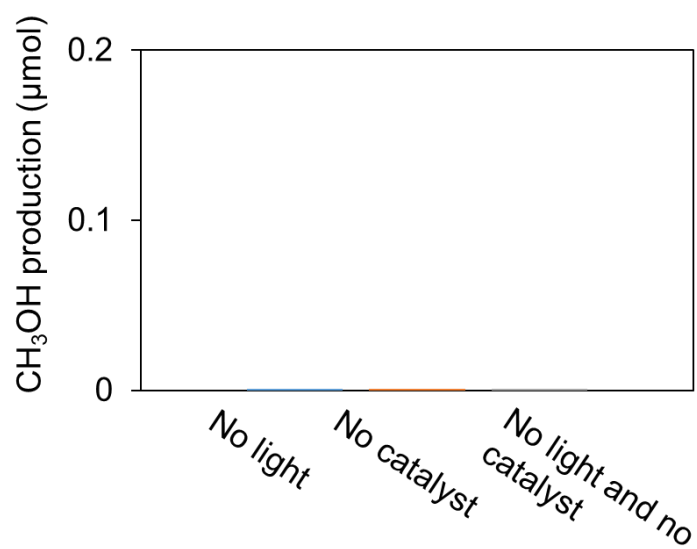

**Fig. S3.** Control experiments of CH<sub>3</sub>OH production over C<sub>3</sub>N<sub>5</sub> using oversaturated CO<sub>2</sub> solution after 1 hour visible light irradiation.

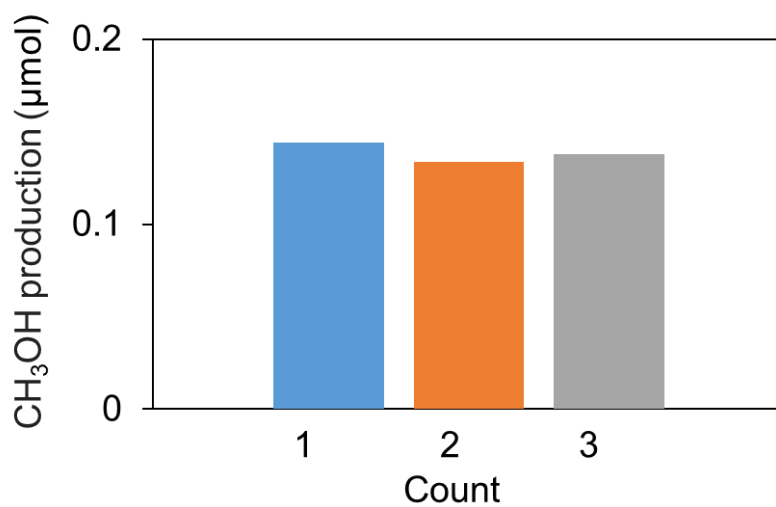

**Fig. S4.** Three cycle experiments of CH<sub>3</sub>OH production over C<sub>3</sub>N<sub>5</sub> using oversaturated CO<sub>2</sub> solution after 1 hour visible light irradiation.

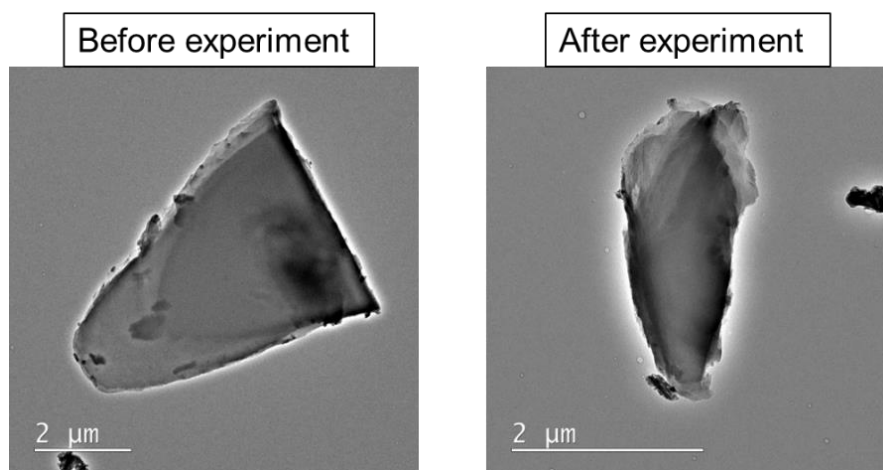

**Fig. S5.** TEM images of  $C_3N_5$  observed before and after photocatalytic experiments.

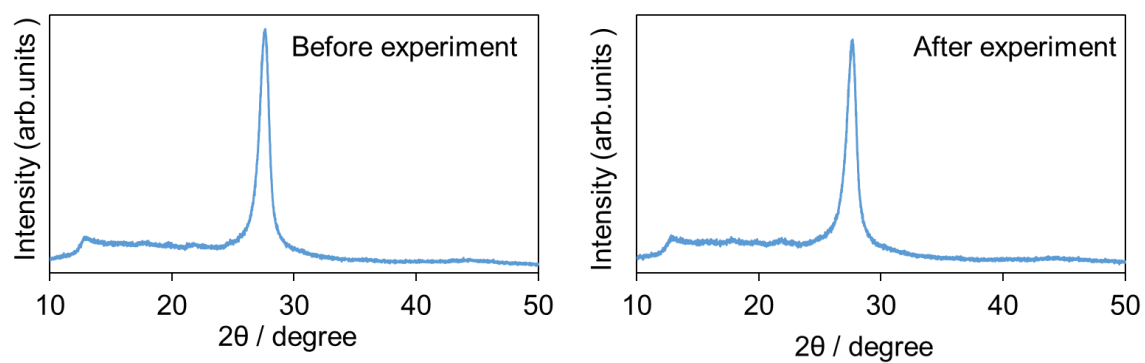

**Fig. S6.** Powder XRD profiles of  $C_3N_5$  observed before and after photocatalytic experiments.
